RESEARCH ARTICLE

# Comparison of the Efficacies and Safety of Combined Therapy between Telbivudine Plus Adefovir and Lamivudine Plus Adefovir in Patients with Hepatitis B Virus Infection in Real-World Practice

Ming-Tsung Lin, Yi-Hao Yen, Ming-Chao Tsai, Po-Lin Tseng, Kuo-Chin Chang, Cheng-Kun Wu, Tsung-Hui Hu\*

Division of Hepato-Gastroenterology, Department of Internal Medicine, Kaohsiung Chang Gung Memorial Hospital and Graduate Institute of Clinical Medical Sciences, College of Medicine, Chang Gung University, Taiwan

\* [dr.hu@msa.hinet.net](mailto:dr.hu@msa.hinet.net)

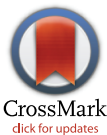

OPEN ACCESS

**Citation:** Lin M-T, Yen Y-H, Tsai M-C, Tseng P-L, Chang K-C, Wu C-K, et al. (2016) Comparison of the Efficacies and Safety of Combined Therapy between Telbivudine Plus Adefovir and Lamivudine Plus Adefovir in Patients with Hepatitis B Virus Infection in Real-World Practice. PLoS ONE 11(11): e0165416. doi:10.1371/journal.pone.0165416

**Editor:** Seung Up Kim, Yonsei University College of Medicine, REPUBLIC OF KOREA

**Received:** May 4, 2016

**Accepted:** October 11, 2016

**Published:** November 2, 2016

**Copyright:** © 2016 Lin et al. This is an open access article distributed under the terms of the [Creative Commons Attribution License](https://creativecommons.org/licenses/by/4.0/), which permits unrestricted use, distribution, and reproduction in any medium, provided the original author and source are credited.

**Data Availability Statement:** All relevant data are within the paper and its Supporting Information files.

**Funding:** Partially supported by a grant (CMRPG8D1451) from Ming-Tsung Lin.

**Competing Interests:** The authors have declared that no competing interests exist.

## Abstract

### Background and Aim

Chronic hepatitis B infection remains a significant health issue worldwide. This study evaluated the efficacy and safety of combined therapy using lamivudine plus adefovir (LAM+ADV) versus telbivudine plus adefovir (LdT+ADV) and the corresponding renal function change and safety.

### Methods

This study enrolled a total of 171 patients (110 patients received LAM+ADV and 60 patients received LdT+ADV). We analyzed the changes in renal function using the estimated glomerular filtration rate (eGFR). The DNA undetectable rate, hepatitis B e antigen (HBeAg) seroconversion rate, and alanine aminotransferase (ALT) normalization rate were analyzed. We checked the serum uric acid, phosphate and creatine kinase, and lactic acid levels to analyze safety. We observed these patients for 48 to 240 weeks and checked their serum profile every 6 months.

### Results

There was no statistically significant difference between the two groups in anti-hepatitis B virus (HBV) efficacy in terms of DNA undetectable rate, ALT normalization rate, and HBeAg seroconversion rate. Both the LAM+ADV and LdT+ADV groups had stable or improved renal function. However, a higher eGFR was found in the LdT+ADV group with continuous serum fluctuation during 3 years of combined therapy as well as a higher serum creatine kinase level.

## Conclusions

Long-term LdT+ADV combined therapy and LAM+ADV combined therapy were both associated with stable or improved renal function. The clinical efficacy was similar between the two groups, but the LdT group had a higher serum creatine kinase level. We need to monitor the data regularly in clinical practice.

## Introduction

Chronic hepatitis B virus (HBV) infection remains a major cause of liver-related morbidity and mortality world as well as more than 350 million chronic infections [1,2]. High levels of HBV DNA and detectable hepatitis B e antigen (HBeAg) are risk factors for progression to end-stage complications such as decompensated cirrhosis and hepatocellular carcinoma (HCC) [3, 4]. Treatment of hepatitis B with nucleoside/nucleotide analogues (NUCs) has been shown to reverse fibrosis and cirrhosis and reduce the risk of hepatic decompensation and HCC [5, 6]. Many new antiviral treatments for hepatitis B have become available in the past years, including peginterferon alfa-2a, lamivudine (LAM), adefovir (ADV), entecavir (ETV), and tenofovir (TDF). LAM is the first NUC, and it is a potent inhibitor of HBV replication, which works by competitive inhibition of the reverse transcriptase, and has an excellent safety profile in both compensated and decompensated cirrhotic patients [7]. Meanwhile, LdT is an oral L-nucleoside with minimal hepatic metabolism and is primarily eliminated by renal clearance [8]. However, the disadvantage of LAM and LdT is their very high resistant rate [9, 10]. More than 60% of patients develop LAM resistance within 5 years of treatment, and up to 20% develop LdT resistance within 2 years of treatment [11, 12]. Adefovir dipivoxil (ADV) inhibits HBV DNA polymerase. Clinically, it has a good activity against LAM-resistant HBV strains [13]. However, renal impairment is frequent after long-term treatment with ADV [14, 15]. Hypophosphatemia is another reported side effect [16]. A previous study suggested that in patients with decompensated cirrhosis, LAM+ADV combined therapy could be used as an initial treatment to achieve rapid suppression of HBV replication and reduce the risk of resistance [17]. Moreover, LdT+ADV combined therapy had a good effect in normalizing alanine aminotransferase (ALT) levels, virus clearance, and HBeAg seroconversion in patients with LdT-associated virologic breakthrough or genotypic resistance to LdT [18]. These oral antiviral agents are all eliminated through the renal route [19]. Therefore, in patients with poor renal function, dose reduction or increased dose intervals are recommended [8]. In patients with compensated and decompensated cirrhosis, long-term LdT therapy improved renal function, especially in patients with increased risk for renal impairment [20, 21]. The study of Perrella et al [22] also showed that LdT prophylaxis for HBV was safe and effective without any significant side effect on the liver or on renal function tests after liver transplantation. However, a decrease in the estimated glomerular filtration rate (eGFR) has been observed in patients with chronic hepatitis B under long-term TDF, ADV, or ETV treatment [14, 23]. A previous study also showed that patients with chronic hepatitis B who were treated with LdT exhibited significantly greater virologic and biochemical responses compared with those treated with LAM [24]. Renal impairment is more commonly associated with ADV treatment than with other HBV NUCs [25, 26]. Some symptoms and side effects such as reversible myopathy, neuropathy, and Fanconi syndrome have been reported with LAM treatment [27–29]. Fanconi syndrome is a disease of the proximal renal tubules, with presentation of hypophosphatemia, hypouricemia, etc [30]. LdT has been associated with myopathy and increase in serum creatine

kinase levels [31]. Creatine kinase, lactate dehydrogenase, and aspartate aminotransferase are all useful serum markers of muscle injury [32]. The increase in serum creatine kinase was 9% in the LdT treatment and 3% in the LAM treatment<sup>10</sup>. Myalgia and nervous system symptoms and other side effects were also reported after LdT treatment [33]. However, there are no studies comparing renal function and the efficacies and side effects of LdT+ADV treatment versus LAM+ADV treatment, especially in LAM- or LdT-resistant patients. Moreover, the efficacy and safety of combined therapy with LdT+ADV and LAM+ADV in patients with chronic hepatitis B and are not well established. As a result, we aimed to investigate the long-term renal outcome of previously resistant patients treated with LAM+ADV and LdT+ADV. Moreover, we evaluated the virology response and renal function and analyzed the fluctuation of serum phosphate, uric acid, lactic acid, and creatine phosphokinase after combined therapy every 6 months until the end of treatment and compared these biochemical changes with abnormal findings found after monotherapy in previous studies [19,34].

## Materials and Methods

This retrospective study enrolled 171 patients with chronic hepatitis B treated with LdT+ADV and LAM+ADV because of LAM or LdT resistance at the Chang Gung Memorial Hospital, Kaohsiung Medical Center, for at least 1 year (May 2003 to May 2013). The criterion of the National Health Insurance of Taiwan for LAM+ADV or LdT+ADV combination therapy was resistance to LAM or LdT monotherapy. The definition of resistance is  $>1$  log (IU/mL) elevated HBV DNA during LdT or LAM monotherapy. The medication dosages were used according to the manufacturer's recommendation based on the patients' renal function. In general, patients took LdT 600 mg plus ADV 10 mg daily or LAM 100 mg plus ADV 10 mg daily. We excluded those patients who received combined therapy less than 1 year or those who have concomitant hepatitis C virus (HCV) or human immunodeficiency virus (HIV) infection. A total of 171 patients were enrolled in this study. In this study, 61 received LdT+ADV therapy as an experimental group. The other 110 received LAM+ADV for comparison. In the LAM plus ADV group, the median duration of LAM monotherapy were 92.5 weeks. In the LdT plus ADV group, the median duration of LAM and LdT monotherapy were 71 weeks and 73 weeks. Serum ALT, phosphate and creatine phosphokinase, uric acid, and lactic acid were routinely measured every 6 months by an automatic analyzer according to manufacturer instructions. We analyzed the fluctuation in renal function using the eGFR, which we calculated every 6 months using the Modification of Diet in Renal Disease (MDRD) equation. We divided these patient into eGFR  $<60$ , 60–90, and  $>90$  mL/min/1.73 m<sup>2</sup> after referring to the KDOQI Clinical Practice Guidelines for Chronic Kidney Disease [35]. We compared the eGFR change after combined therapy with the baseline eGFR. We compared the stage change of eGFR at 48, 96, 144, 192, and 240 weeks. Regarding the antiviral efficacies, we analyzed the DNA undetectable rate, ALT normalization, and HBeAg serological response. The serum DNA level was estimated at baseline and every 6 months until the stop of medication or at end of the study. Serum HBV DNA was assessed quantitatively by real-time TaqMan PCR technology (Roche, Switzerland), with an estimated lower limit of detection of 20 IU/mL. The study protocol conformed to the ethical guidelines of the Declaration of Helsinki and was approved by the Institutional Review Board.

## Statistical analysis

Quantitative data were presented as median (range), and categorical data were expressed as numbers and percentages. The HBV DNA levels were logarithmically transformed for analysis. The comparison of patients with various categories was done using  $\chi^2$  test or Fisher exact test

for categorical variables. The continuous variable was analyzed with Student t test. Many data were missing in our study because of the unavailability of preserved blood. Therefore, we used repeated measures and mixed models for statistical analysis. *P* values less than 0.05 were considered statistically significant.

## Results

The baseline characteristics of the enrolled patients are shown in Table 1. The general baseline characteristics were similar between the two groups ( $P > 0.05$ ). The mean baseline HBeAg status, DNA level, serum phosphate, uric acid, lactic acid, and eGFR were similar between these two groups, but the LAM+ADV group had more cirrhotic patients and higher baseline ALT level ( $P < 0.05$ ). The mean underlying HBV DNA was 4.98 (3.61–5.97) (log DNA, median (IQR)) IU/mL in the LAM+ADV group and 4.69 (3.72–6.82) (log DNA, median (IQR)) IU/mL in the LdT+ADV group ( $P > 0.05$ ). A higher baseline serum creatine kinase level was noted in the LdT+ADV group (borderline significant,  $P = 0.045$ ). After 48 to 240 weeks of treatment, both the LdT+ADV and the LAM+ADV groups showed improved renal function, regardless of the duration (48, 96, 144, 192 and 240 weeks) of the combined therapy (Table 2 and S1 to S4 Tables,  $P > 0.05$ ). (Notably, the LdT+ADV group had a higher proportion of stable or improved eGFR at every stage of therapy. On the contrary, the LAM+ADV group had a higher proportion of worse eGFR, but with borderline insignificance.) In addition, the LdT+ADV group exhibited a higher mean eGFR than the LAM+ADV group ( $P < 0.001$ ) during 144 weeks of combined therapy (Fig 1), but they had similar baseline data. After 144 weeks of combined therapy, there was no statistically significant difference between the two groups ( $P = 0.634$ ), but the number of cases decreased during the follow-up. In terms of efficacy analysis, the ALT normalization rate was 62.3% in the LAM group and 45.2% in the LdT group after 48 weeks of treatment ( $P > 0.05$ , Table 3). After 96 weeks of combined therapy, the ALT normalization rate was 80.6% in the LAM group and 60.9% in the LdT group ( $P > 0.05$ ). A similar ALT normalization rate was found in both groups. The HBV DNA undetectable rate was 53.8% after 48 weeks of treatment and 66.7% after 96 weeks of treatment in the LAM group, but 48.6% after 48 weeks of treatment and 52.9% after 96 weeks in the LdT group. A similar HBV DNA

**Table 1. Basic characteristics of 171 combined therapy patients.**

|                                                           | LAM+ADV (n = 110)   | LdT+ADV (n = 61)   | <i>P</i> value |
|-----------------------------------------------------------|---------------------|--------------------|----------------|
| Sex (male/female)                                         | 89/21               | 43/18              | 0.120          |
| Age (years), median (IQR)                                 | 53 (44.75–60.00)    | 53 (44.00–62.00)   | 0.833          |
| Liver cirrhosis (yes/no)                                  | 51/59               | 18/43              | <b>0.031</b>   |
| Treatment duration (weeks), median (IQR)                  | 152 (104.75–191.25) | 110 (85–155.5)     | <b>0.003</b>   |
| HBeAg (+/-)                                               | 36/74               | 26/35              | 0.197          |
| Baseline eGFR (mL/min/1.73 m <sup>2</sup> ), median (IQR) | 78 (66–94)          | 84 (70–101)        | 0.137          |
| Baseline ALT, U/L, median (IQR)                           | 90.5 (37.5–225.25)  | 40 (29–92)         | <b>0.002</b>   |
| Underlying HBV DNA (log DNA) IU/mL, median (IQR)          | 4.98 (3.61–5.97)    | 4.69 (3.72–6.82)   | 0.394          |
| Baseline serum phosphate (mg/dL), median (IQR)            | 4.5 (4.1–5.33)      | 4.5 (3.7–5.3)      | 0.583          |
| Baseline serum CPK (U/L), median (IQR)                    | 76 (52–102)         | 93 (64–144.75)     | <b>0.045</b>   |
| Baseline serum uric acid (mg/dL), median (IQR)            | 3.1 (2.3–4.15)      | 3.15 (2.33–4.38)   | 0.508          |
| Baseline serum lactate (mg/dL)                            | 65 (47.3–72.6)      | 57.6 (50.5–70.7)   | 0.439          |
| Mean baseline serum calcium (mg/dL), median (IQR)         | 9 (8.55–9.20)       | 9.3 (8.90–9.50)    | <b>0.021</b>   |
| Mean baseline BUN/Cr level, median (IQR)                  | 14.49 (11.48–18.33) | 15.15 (11.8–22.64) | 0.156          |

IQR, interquartile range; CPK, creatine kinase.

doi:10.1371/journal.pone.0165416.t001

**Table 2. Changes in eGFR (mL/min/1.73 m<sup>2</sup>) in the LAM+ADV and LdT+ADV treatment groups after 48 weeks of combined therapy.**

|                                                                | Patient number according to eGFR after 48 weeks of treatment |       |     |       |
|----------------------------------------------------------------|--------------------------------------------------------------|-------|-----|-------|
|                                                                | <60                                                          | 60–90 | >90 | Total |
| <b>LAM+ADV group</b>                                           |                                                              |       |     |       |
| Patient number according to eGFR of baseline, n = 99           |                                                              |       |     |       |
| <60                                                            | 5                                                            | 8     | 0   | 13    |
| 60–90                                                          | 12                                                           | 38    | 8   | 58    |
| >90                                                            | 1                                                            | 13    | 14  | 28    |
| Improved eGFR, patient number/total (%)                        | 16/99 (16.2)                                                 |       |     |       |
| Stable eGFR, patient number/total (%)                          | 57/99 (57.6)                                                 |       |     |       |
| Stable or improved eGFR, patient number/total (%)              | 73/99 (73.7)                                                 |       |     |       |
| Decreased eGFR, patient number/total (%)                       | 26/99 (26.3)                                                 |       |     |       |
| <b>LdT+ADV group</b>                                           |                                                              |       |     |       |
| Patient number according to eGFR of baseline, n = 59           |                                                              |       |     |       |
| <60                                                            | 6                                                            | 2     | 0   | 8     |
| 60–90                                                          | 3                                                            | 17    | 6   | 26    |
| >90                                                            | 0                                                            | 7     | 18  | 25    |
| Improved eGFR, patient number/total (%)                        | 8/59 (13.6)                                                  |       |     |       |
| Stable eGFR, patient number/total (%)                          | 41/59 (69.5)                                                 |       |     |       |
| Stable or improved eGFR, patient number/total (%)              | 49/59 (83.1)                                                 |       |     |       |
| Decreased eGFR, patient number/total (%)                       | 10/59 (16.9)                                                 |       |     |       |
| <b>LAM+ADV versus LdT+ADV group in stable or improved eGFR</b> |                                                              |       |     |       |
| 73/99 versus 49/59, <i>P</i> = 0.177                           |                                                              |       |     |       |

doi:10.1371/journal.pone.0165416.t002

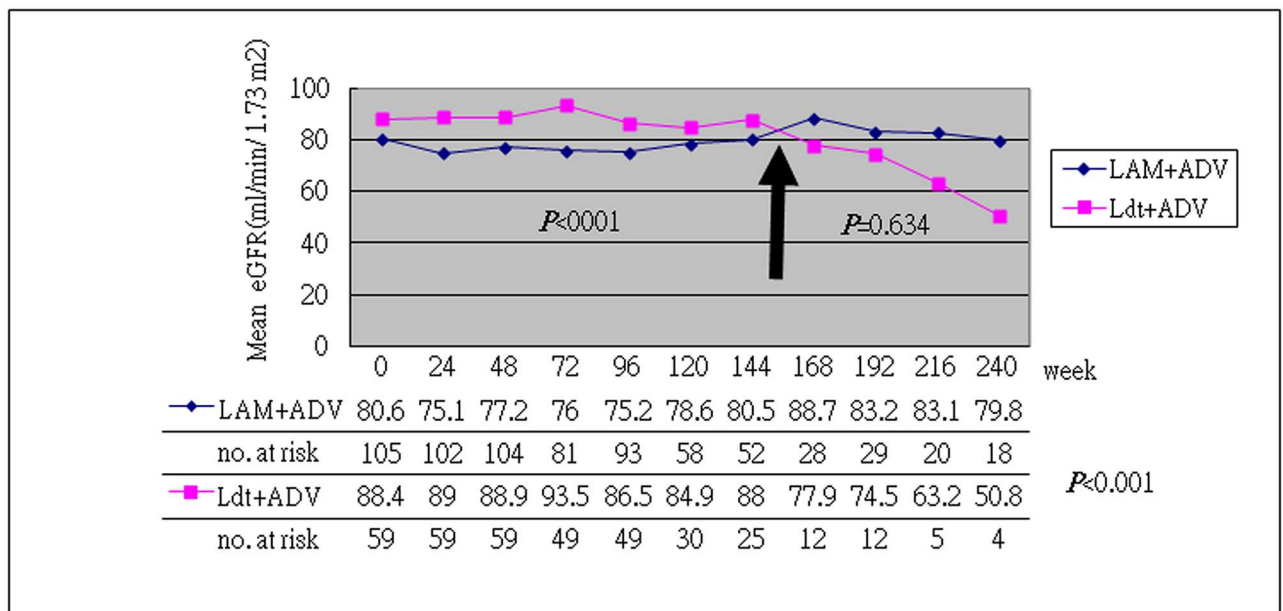

**Fig 1. Continuous change in serum eGFR during 240 weeks of combined therapy.** During 144 weeks of combined therapy, the LdT +ADV group had a higher eGFR than the LAM+ADV group (*P*<0.001), but both had similar baseline data (*P*>0.05). After 144 weeks of combined therapy, there was no statistically significant difference between the two groups (*P* = 0.634), but there were fewer patients.

doi:10.1371/journal.pone.0165416.g001

**Table 3. Comparison of the efficacies between LAM+ADV and LdT+ADV treatment in ALT normalization rate and DNA undetectable rate and serum HBeAg seroconversion rate.**

|                                                             | LAM+ADV group | LdT+ADV group | P value |
|-------------------------------------------------------------|---------------|---------------|---------|
| <b>ALT normalization rate (&lt;40 U/L) (yes/total) (%)</b>  |               |               |         |
| 48 weeks                                                    | 48/77 (62.3)  | 14/31 (45.2)  | 0.102   |
| 96 weeks                                                    | 58/72 (80.6)  | 14/23 (60.9)  | 0.055   |
| <b>DNA undetectable rate (&lt;20 IU/mL) (yes/total) (%)</b> |               |               |         |
| 48 weeks                                                    | 21/39 (53.8)  | 17/35 (48.6)  | 0.650   |
| 96 weeks                                                    | 30/45 (66.7)  | 9/17 (52.9)   | 0.318   |
| <b>e-Seroconversion rate (yes/total) (%)</b>                |               |               |         |
| within 48 weeks                                             | 6/30 (20)     | 3/22 (13.6)   | 0.717   |

doi:10.1371/journal.pone.0165416.t003

undetectable rate was found in both groups as well ( $P>0.05$ ). The HBV e-seroconversion after 48 weeks of treatment was 20% in the LAM group and 13.6% in the LdT group ( $P>0.05$ ). We found a similar antiviral efficacy in both groups. In terms of safety analysis of combined therapy, we found a similar continuous change in the serum phosphate, uric acid, and lactate levels (Figs 2 and 3 and S1 and S3 Figs,  $P>0.05$ ). However, the LdT group had a higher mean serum creatine kinase level than the LAM group (S2 Fig,  $P<0.001$ ), but treatment was not discontinued in any patient because of adverse effect.

### Discussion

This study comprehensively compared the efficacy and safety of LdT+ADV and LAM+ADV combined therapy, which is important because chronic hepatitis B remains a public health problem despite the advancements in medicine. End-stage liver disease secondary to HBV is the leading indication for liver transplantation in Asia [36]. Studies [37, 38] showed that the risk for HCC was greatest in those who were older and who remained HBeAg-positive and increased significantly in individuals with a high serum HBV-DNA level. As a result, the

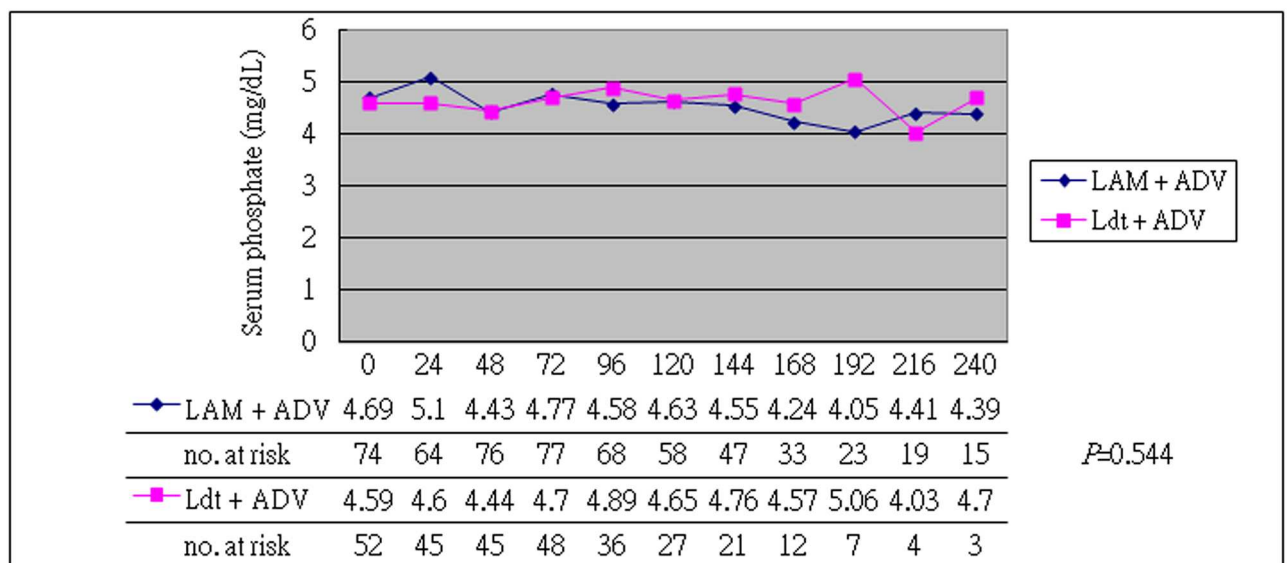

**Fig 2. Continuous change in serum phosphate concentration during 240 weeks of combined therapy.** There was no statistically significant difference between the two groups ( $P = 0.544$ ).

doi:10.1371/journal.pone.0165416.g002

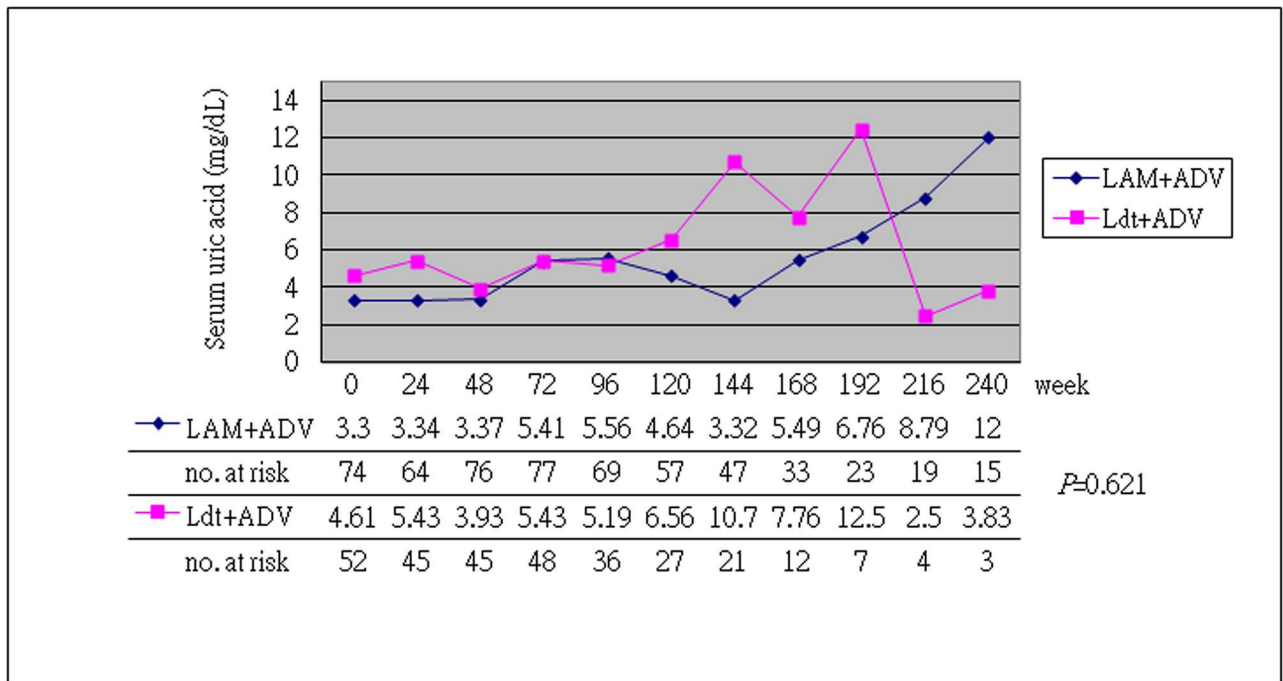

**Fig 3. Continuous change in serum uric acid concentration during 240 weeks of combined therapy.** There was no statistically significant difference between LAM+ADV and Ldt+ADV combined therapy (*P* = 0.621).

doi:10.1371/journal.pone.0165416.g003

normalization of liver enzyme levels, viral suppression and clearance, and reduction in histologic scores of liver inflammation or fibrosis are important for HBV treatment. The loss of HBsAg or HBeAg seroconversion is the optimal goal of treatment and is associated with a lower incidence of cirrhosis and HCC and improved survival rates [39–41]. A previous study showed that in patients who did not respond to LAM monotherapy, LAM+ADV combined therapy could increase ALT normalization and HBV DNA clearance, but not HBeAg clearance or seroconversion [42]. The study of Yao et al [43] also showed that Ldt+ADV combination treatment had better efficacy than LdT monotherapy and lower drug resistance rate in chronic hepatitis B patients with higher viral load. Chen et al [44] had the similar conclusion that prolonged combination therapy (LAM+ADV and Ldt+ADV) was more effective than monotherapy (ADV), regardless of the ALT normalization rate, sustained viral response, or resistance rate. Our previous study, despite the smaller number of patients, demonstrated that Ldt+ADV is a suitable second-line salvage therapy for LAM-resistant patients [45]. In our present study, we found the similar effect in terms of HBeAg seroconversion, HBV DNA undetectable rate, and/or ALT normalization rate in the Ldt+ADV and LAM+ADV groups after 48 or 96 weeks of treatment (*P* < 0.05). The M204 V/I or L180M signature mutations were the primary basis for LdT and LAM resistance in past studies and in our patient groups, but these mutations remained sensitive to ADV treatment [46,47]. As a result, we found similar treatment efficacies between the two groups. The study of Gane et al [20] noted a sustained improvement in renal function in the LdT treatment group but not in the LAM group; however, in our study, we found that renal function improved in both the Ldt+ADV group and the LAM+ADV group after 48 to 240 weeks of combined therapy (*P* > 0.05). However, the Ldt+ADV group had a higher mean eGFR during 144 weeks of treatment (*P* < 0.05), which is compatible with a previous monotherapy study [14], which also showed that ADV monotherapy may impair renal function. Furthermore, although TDF had better antiviral potency than LdT and is the newest

medication for hepatitis B recommended by the American Association for the Study of Liver Diseases (AASLD), LdT was found to have a more superior renal protection than TDF [48, 49]. The mechanism of improvement in renal function after combined therapy remains to be determined but may be related with HBV eradication. Liaw et al [12] showed that the safety profile of LdT is similar to LAM, but elevated serum creatine kinase levels were more common in patients under LdT treatment. Our study found the similar phenomenon in combined therapy. Lin et al [50] concluded that LdT has a renoprotective effect when HBV patients under cisplatin-based chemotherapy for HCC receives LdT preemptive therapy. Gane et al [20] showed that improvement in eGFR was observed in the LdT group but not in the LAM group. We noted the various conclusions regarding renal function from different previous studies. However, in our long-term follow-up on the fluctuation of renal function after combined therapy to 5 years, we found more patients with improved renal function, with a similar proportion between patients who received LdT+ADV and LAM+ADV combined therapy ( $P>0.05$ ). LdT treatment can induce substantial myopathy. As a result, we need to monitor the muscular function and clinical symptoms of the patients treated with this drug to prevent possible major complications. In our present study, we validated the similar phenomenon in combined therapy. However, no significant difference was found in other parameters such as serum phosphate, uric acid, or lactate. Though we clarified the benefit and side effect of combined therapy (LAM+ADV or LdT+ADV), however, add-on ADV is no longer the treatment options nowadays. The newest AASLD guideline suggest that tenofovir and entecavir are preferred because of their better potency and lower risk of resistance [51]. As a result, finally, in the LAM+ADV group (110 patients), 47 patients (42.7%) switched to TDF and in the LdT+ADV group (61 patients), 24 patients (39.3%) switched to TDF in our study.

In conclusion, our study provided clinical evidence that combination therapy with LdT+ADV or LAM+ADV leads to significant decreases in serum HBV DNA and ALT levels, without specific damage to renal function in chronic hepatitis B patients.

Our study showed a similar proportion of renal function improvement between the LAM+ADV and the LdT+ADV groups during 48 to 240 weeks of combined therapy but higher mean eGFR in the LdT group during treatment. We also provided a valuable safety database for combined therapy for clinical practice, as combined therapy continues to be provided to some patients with LdT or LAM resistance.

## Supporting Information

**S1 Fig. Continuous change in serum lactate concentration during 240 weeks of combined therapy.** There was no statistically significant difference between LAM+ADV and LdT+ADV combined therapy ( $P = 0.728$ ).

(TIF)

**S2 Fig. Continuous change in serum creatine kinase (CPK) concentration among 240 weeks combined therapy.** Higher serum CPK concentrations were found in the LdT+ADV group during 240 weeks of combined therapy ( $P<0.001$ ).

(TIF)

**S3 Fig. Combined analysis of continuous change in serum eGFR and phosphate concentration among 240 weeks combined therapy.**

(TIF)

**S1 Table. Changes in eGFR ( $\text{mL}/\text{min}/1.73 \text{ m}^2$ ) in the LAM+ADV and LdT+ADV treatment groups after 96 weeks of combined therapy.**

(DOC)



**S2 Table. Changes in eGFR (mL/min/1.73 m<sup>2</sup>) in the LAM+ADV and LdT+ADV treatment groups after 144 weeks of combined therapy.**

(DOC)

**S3 Table. Changes in eGFR (mL/min/1.73 m<sup>2</sup>) in the LAM+ADV and LdT+ADV treatment groups after 192 weeks of combined therapy.**

(DOC)

**S4 Table. Changes in eGFR (mL/min/1.73 m<sup>2</sup>) in LAM+ADV and LdT+ADV treatment after 240 weeks of combined therapy.**

(DOC)

## Acknowledgments

This study was partially supported by a grant (CMRPG8D1451) from Ming-Tsung Lin.

## Author Contributions

**Conceptualization:** MTL.

**Data curation:** MTL YHY PLT KCC CKW.

**Formal analysis:** MTL THH.

**Funding acquisition:** MTL.

**Investigation:** MTL YHY PLT KCC CKW.

**Methodology:** MTL MCT.

**Project administration:** THH.

**Resources:** MTL YHY PLT KCC CKW.

**Software:** MCT.

**Supervision:** MCT PLT KCC CKW THH.

**Validation:** MTL MCT PLT KCC CKW.

**Visualization:** YHY PLT KCC CKW THH.

**Writing – original draft:** MTL.

**Writing – review & editing:** MTL THH.

## References

1. Lavanchy D.. Hepatitis B virus epidemiology, disease burden, treatment, and current and emerging prevention and control measures. *J Viral Hepat.* 2004; 11:97–107. PMID: [14996343](#)
2. Lok A. S. & McMahon B. J. Chronic hepatitis B: update 2009. *Hepatology.* 2009; 50:661–2. doi: [10.1002/hep.23190](#) PMID: [19714720](#)
3. de Jongh FE, Janssen HL, de Man RA, Hop WC, Schalm SW, van Blankenstein M. Survival and prognostic indicators in hepatitis B surface antigen-positive cirrhosis of the liver. *Gastroenterology.* 1992; 103:1630–5. PMID: [1426884](#)
4. Fattovich G, Brollo L, Giustina G, Noventa F, Pontisso P, Alberti A et al. Natural history and prognostic factors for chronic hepatitis type B. *Gut.* 1991; 32:294–8. PMID: [2013423](#)
5. Marcellin P, Gane E, Buti M, Afdhal N, Sievert W, Jacobson IM et al. Regression of cirrhosis during treatment with tenofovir disoproxil fumarate for chronic hepatitis B: a 5-year open-label follow-up study. *Lancet.* 2013; 381:468–75 doi: [10.1016/S0140-6736\(12\)61425-1](#) PMID: [23234725](#)

6. Liaw YF, Sung JJ, Chow WC, Farrell G, Lee CZ, Yuen H et al. Lamivudine for patients with chronic hepatitis B and advanced liver disease. *N Engl J Med.* 2004; 351:1521–31. doi: [10.1056/NEJMoa033364](https://doi.org/10.1056/NEJMoa033364) PMID: [15470215](https://pubmed.ncbi.nlm.nih.gov/15470215/)
7. Jiang L, Jiang LS, Cheng NS, Yan LN. Current prophylactic strategies against hepatitis B virus recurrence after liver transplantation. *World J Gastroenterol.* 2009; 15:2489–99. PMID: [19468999](https://pubmed.ncbi.nlm.nih.gov/19468999/)
8. Zhou XJ, Swan S, Smith WB, Marbury TC, Dubuc-Patrick G, Chao GC et al. Pharmacokinetics of telbivudine in subjects with various degrees of renal impairment. *Antimicrob Agents Chemother.* 2007; 51:4231–5. doi: [10.1128/AAC.00557-07](https://doi.org/10.1128/AAC.00557-07) PMID: [17875994](https://pubmed.ncbi.nlm.nih.gov/17875994/)
9. Gaia S, Marzano A, Smedile A, Barbon V, Abate ML, Olivero A et al. Four years of treatment with lamivudine: clinical and virological evaluations in HBe antigen-negative chronic hepatitis B. *Aliment Pharmacol Ther.* 2004; 20:281–7. doi: [10.1111/j.1365-2036.2004.02073.x](https://doi.org/10.1111/j.1365-2036.2004.02073.x) PMID: [15274664](https://pubmed.ncbi.nlm.nih.gov/15274664/)
10. Matthews SJ. Telbivudine for the management of chronic hepatitis B virus infection. *Clin Ther.* 2007; 29:2635–53. doi: [10.1016/j.clinthera.2007.12.032](https://doi.org/10.1016/j.clinthera.2007.12.032) PMID: [18201580](https://pubmed.ncbi.nlm.nih.gov/18201580/)
11. Lok AS, Lai CL, Leung N, Yao GB, Cui ZY, Schiff ER et al. Long-term safety of lamivudine treatment in patients with chronic hepatitis B. *Gastroenterology.* 2003; 125:1714–22. PMID: [14724824](https://pubmed.ncbi.nlm.nih.gov/14724824/)
12. Liaw YF, Gane E, Leung N, Zeuzem S, Wang Y, Lai CL et al. 2-Year GLOBE trial results: telbivudine is superior to lamivudine in patients with chronic hepatitis B. *Gastroenterology.* 2009; 136:486–95. doi: [10.1053/j.gastro.2008.10.026](https://doi.org/10.1053/j.gastro.2008.10.026) PMID: [19027013](https://pubmed.ncbi.nlm.nih.gov/19027013/)
13. Hadziyannis SJ, Tassopoulos NC, Heathcote EJ, Chang TT, Kitis G, Rizzetto M et al. Long-term therapy with adefovir dipivoxil for HBeAg-negative chronic hepatitis B. *N Engl J Med.* 2005; 352:2673–81. doi: [10.1056/NEJMoa042957](https://doi.org/10.1056/NEJMoa042957) PMID: [15987916](https://pubmed.ncbi.nlm.nih.gov/15987916/)
14. Kim YJ, Cho HC, Sinn DH, Gwak GY, Choi MS, Koh KC et al. Frequency and risk factors of renal impairment during long-term adefovir dipivoxil treatment in chronic hepatitis B patients. *J Gastroenterol Hepatol.* 2012; 27: 306–12. doi: [10.1111/j.1440-1746.2011.06852.x](https://doi.org/10.1111/j.1440-1746.2011.06852.x) PMID: [21777281](https://pubmed.ncbi.nlm.nih.gov/21777281/)
15. Mederacke I, Yurdaydin C, Großhennig A, Erhardt A, Cakaloglu Y, Yalcin K et al. Renal function during treatment with adefovir plus peginterferon alfa-2a vs either drug alone in hepatitis B/D co-infection. *J Viral Hepat.* 2012; 19:387–95. doi: [10.1111/j.1365-2893.2011.01560.x](https://doi.org/10.1111/j.1365-2893.2011.01560.x) PMID: [22571900](https://pubmed.ncbi.nlm.nih.gov/22571900/)
16. Hadziyannis SJ, Tassopoulos NC, Heathcote EJ, Chang TT, Kitis G, Rizzetto M et al. Long-term therapy with adefovir dipivoxil for HBeAg-negative chronic hepatitis B for up to 5 years. *Gastroenterology.* 2006; 131:1743–51. PMID: [17087951](https://pubmed.ncbi.nlm.nih.gov/17087951/)
17. Lok AS, McMahon BJ. Chronic hepatitis B. *Hepatology.* 2007; 45:507–39. PMID: [17256718](https://pubmed.ncbi.nlm.nih.gov/17256718/)
18. Zhang Y, Lian JQ, Li Y, Wang JP, Huang CX, Bai XF et al. Telbivudine plus adefovir therapy for chronic hepatitis B patients with virological breakthrough or genotypic resistance to telbivudine. *Eur J Gastroenterol Hepatol.* 2013; 25: 814–9. doi: [10.1097/MEG.0b013e32835ee516](https://doi.org/10.1097/MEG.0b013e32835ee516) PMID: [23406845](https://pubmed.ncbi.nlm.nih.gov/23406845/)
19. Fontana RJ. Side effects of long-term oral antiviral therapy for hepatitis B. *Hepatology.* 2009; 49: S185–95 doi: [10.1002/hep.22885](https://doi.org/10.1002/hep.22885) PMID: [19399802](https://pubmed.ncbi.nlm.nih.gov/19399802/)
20. Gane EJ, Deray G, Liaw YF, Lim SG, Lai CL, Rasenack J et al. Telbivudine improves renal function in patients with chronic hepatitis B. *Gastroenterology.* 2014; 146:138–146. doi: [10.1053/j.gastro.2013.09.031](https://doi.org/10.1053/j.gastro.2013.09.031) PMID: [24067879](https://pubmed.ncbi.nlm.nih.gov/24067879/)
21. Tsai MC, Chen CH, Hung CH, Lee CM, Chiu KW, Wang JH et al. A comparison of efficacy and safety of 2-year telbivudine and entecavir treatment in patients with chronic hepatitis B: a match-control study. *Clin Microbiol Infect.* 2014; 20: O90–O100. doi: [10.1111/1469-0691.12220](https://doi.org/10.1111/1469-0691.12220) PMID: [23659493](https://pubmed.ncbi.nlm.nih.gov/23659493/)
22. Perrella A, Lanza AG, Santaniello W, Pisaniello D, Dicostanzo G, Calise F et al. Telbivudine as prophylaxis for hepatitis B virus recurrence after liver transplantation: a case series in single-center experience. *Transplant Proc.* 2012; 44:1986–8. doi: [10.1016/j.transproceed.2012.06.019](https://doi.org/10.1016/j.transproceed.2012.06.019) PMID: [22974888](https://pubmed.ncbi.nlm.nih.gov/22974888/)
23. Gish RG, Clark MD, Kane SD, Shaw RE, Mangahas MF, Baqai S. Similar risk of renal events among patients treated with tenofovir or entecavir for chronic hepatitis B. *Clin Gastroenterol Hepatol.* 2012; 10: 941–6. doi: [10.1016/j.cgh.2012.04.008](https://doi.org/10.1016/j.cgh.2012.04.008) PMID: [22507876](https://pubmed.ncbi.nlm.nih.gov/22507876/)
24. Lai CL, Leung N, Teo EK, Tong M, Wong F, Hann HW et al. A 1-year trial of telbivudine, lamivudine, and the combination in patients with hepatitis B e antigen-positive chronic hepatitis B. *Gastroenterology.* 2005; 129: 528–36. PMID: [16083710](https://pubmed.ncbi.nlm.nih.gov/16083710/)
25. Izzedine H, Hulot JS, Launay-Vacher V, Marcellini P, Hadziyannis SJ, Currie G et al. Renal safety of adefovir dipivoxil in patients with chronic hepatitis B: two double-blind, randomized, placebo-controlled studies. *Kidney Int.* 2004; 66: 1153–8. PMID: [15327411](https://pubmed.ncbi.nlm.nih.gov/15327411/)
26. Marcellin P, Chang TT, Lim SG, Sievert W, Tong M, Arterburn S et al. Long-term efficacy and safety of adefovir dipivoxil for the treatment of hepatitis B e antigen-positive chronic hepatitis B. *Hepatology.* 2008; 48: 750–8. doi: [10.1002/hep.22414](https://doi.org/10.1002/hep.22414) PMID: [18752330](https://pubmed.ncbi.nlm.nih.gov/18752330/)
27. Adani GL, Baccarani U, Risaliti A, Bresadola F, Della Rocca G, Viale P. Rhabdomyolysis due to Lamivudine administration in a liver transplant recipient. *Am J Transplant.* 2005; 5:634. PMID: [15707423](https://pubmed.ncbi.nlm.nih.gov/15707423/)

28. Fodale V, Mazzeo A, Praticò C, Aguenouz M, Toscano A, Santamaria LB et al. Fatal exacerbation of peripheral neuropathy during lamivudine therapy: evidence for iatrogenic mitochondrial damage. *Anaesthesia*. 2005; 60:806–10. PMID: [16029231](#)
29. Bayrakci US, Baskin E, Ozcay F, Ozdemir BH, Karakayali H, Haberal M. Renal Fanconi syndrome and myopathy after liver transplantation: drug-related mitochondrial cytopathy? *Pediatr Transplant*. 2008; 12:109–12. doi: [10.1111/j.1399-3046.2007.00839.x](#) PMID: [18186898](#)
30. Gara N, Zhao X, Collins MT, Chong WH, Kleiner DE, Jake Liang T et al. Renal tubular dysfunction during long-term adefovir or tenofovir therapy in chronic hepatitis B. *Aliment Pharmacol Ther*. 2012; 35:1317–25 doi: [10.1111/j.1365-2036.2012.05093.x](#) PMID: [22506503](#)
31. Wang Y, Thongsawat S, Gane EJ, Liaw YF, Jia J, Hou J et al. Efficacy and safety of continuous 4-year telbivudine treatment in patients with chronic hepatitis B. *J Viral Hepat*. 2013; 20:e37–46. doi: [10.1111/jvh.12025](#) PMID: [23490388](#)
32. Brancaccio P, Lippi G, Maffulli N. Biochemical markers of muscular damage. *Clin Chem Lab Med*. 2010; 48:757–67 doi: [10.1515/CCLM.2010.179](#) PMID: [20518645](#)
33. Zhang XS, Jin R, Zhang SB, Tao ML. Clinical features of adverse reactions associated with telbivudine. *World J Gastroenterol*. 2008; 14:3549–53. doi: [10.3748/wjg.14.3549](#) PMID: [18567085](#)
34. Ridruejo E, Silva MO. Safety of long-term nucleos(t)ide treatment in chronic hepatitis B. *Expert Opin Drug Saf*. 2012; 11:357–60 doi: [10.1517/14740338.2012.672972](#) PMID: [22417072](#)
35. National Kidney Foundation. K/DOQI clinical practice guidelines for chronic kidney disease: evaluation, classification, and stratification. *Am J Kidney Dis*. 2002; 39:S1–266. PMID: [11904577](#)
36. Lo CM, Fan ST, Liu CL, Lai CL, Wong J. Prophylaxis and treatment of recurrent hepatitis B after liver transplantation. *Transplantation*. 2003; 75:S41–4. PMID: [12589139](#)
37. Yang H, Lu SN, Liaw YF, You SL, Sun CA, Wang LY et al. Hepatitis B e antigen and the risk of hepatocellular carcinoma. *N Engl J Med*. 2002; 347:168–74. PMID: [12124405](#)
38. Chen CJ, Yang HI, Su J, Jen CL, You SL, Lu SN et al. Risk of hepatocellular carcinoma across a biological gradient of serum hepatitis B virus DNA level. *JAMA*. 2006; 295:65–73. PMID: [16391218](#)
39. Fattovich G, Bortolotti F, Donato F. Natural history of chronic hepatitis B: special emphasis on disease progression and prognostic factors. *J Hepatol*. 2008; 48:335–52. PMID: [18096267](#)
40. Hui CK, Leung N, Shek TW, Yao H, Lee WK, Lai JY et al. Sustained disease remission after spontaneous HBeAg seroconversion is associated with reduction in fibrosis progression in chronic hepatitis B Chinese patients. *Hepatology*. 2007; 46:690–8. PMID: [17680649](#)
41. Liaw YF, Lau GK, Kao JH, Gane E. Hepatitis B e antigen seroconversion: a critical event in chronic hepatitis B virus infection. *Dig Dis Sci*. 2010; 55:2727–34 doi: [10.1007/s10620-010-1179-4](#) PMID: [20238245](#)
42. Peters MG, Hann Hw, Martin P, Heathcote EJ, Buggisch P, Rubin R et al. Adefovir dipivoxil alone or in combination with lamivudine in patients with lamivudine-resistant chronic hepatitis B. *Gastroenterology*. 2004; 126:91–101. PMID: [14699491](#)
43. Yao N, Wang C, Yu Z, Zhao K, Kang W, Liu Q et al. [Efficacy and safety of telbivudine alone and combined with adefovir for the treatment of nucleos(t)ide-naïve chronic hepatitis B in patients with high-level hepatitis B virus load]. *Zhonghua Gan Zang Bing Za Zhi*. 2015; 23:250–3. doi: [10.3760/cma.j.issn.1007-3418.2015.04.004](#) PMID: [26133814](#)
44. Chen EQ, Bai L, Chen LL, Zhou TY, Du LY, Tang H. Prolonged Combination Therapy is More Effective than Monotherapy in Management of Chronic Hepatitis B Patients With Sustained Virological Response: An Experience From a 'Real-World' Clinical Setting. *Iran Red Crescent Med J*. 2013; 15: e7788. doi: [10.5812/ircmj.7788](#) PMID: [24693412](#)
45. Lin MT, Chou YP, Hu TH, Yu HC, Hsu YC, Tsai MC et al. Telbivudine and adefovir combination therapy for patients with chronic lamivudine-resistant hepatitis B virus infections. *Arch Virol*. 2014; 159:29–37 doi: [10.1007/s00705-013-1786-4](#) PMID: [23857507](#)
46. Lok AS, Zoulim F, Locarnini S, Bartholomeusz A, Ghany MG, Pawlotsky JM et al. Antiviral drug-resistant HBV: standardization of nomenclature and assays and recommendations for management. *Hepatology*. 2007; 46:254–65. doi: [10.1002/hep.21698](#) PMID: [17596850](#)
47. Rapti I, Dimou E, Mitsoula P, Hadziyannis SJ. Adding-on versus switching-to adefovir therapy in lamivudine-resistant HBeAg-negative chronic hepatitis B. *Hepatology*. 2007; 45:307–13. doi: [10.1002/hep.21534](#) PMID: [17256746](#)
48. Terrault NA, Bzowej NH, Chang KM, Hwang JP, Jonas MM, Murad MH. AASLD guidelines for treatment of chronic hepatitis B. *Hepatology*. 2016; 63:261–83. doi: [10.1002/hep.28156](#) PMID: [26566064](#)
49. Tsai MC, Chen CH, Tseng PL, Hung CH, Chiu KW, Wang JH, et al. Comparison of renal safety and efficacy of telbivudine, entecavir and tenofovir treatment in chronic hepatitis B patients: real world experience. *Clin Microbiol Infect*. 2016; 22:95.e1–7

50. Lin CL, Chien RN, Yeh C, Hsu CW, Chang ML, Chen YC et al. Significant renoprotective effect of telbivudine during preemptive antiviral therapy in advanced liver cancer patients receiving cisplatin-based chemotherapy: a case-control study. *Scand J Gastroenterol.* 2014; 49:1456–64. doi: [10.3109/00365521.2014.962604](https://doi.org/10.3109/00365521.2014.962604) PMID: [25283499](https://pubmed.ncbi.nlm.nih.gov/25283499/)
51. Terrault NA, Bzowej NH, Chang KM, Hwang JP, Jonas MM, Murad MH. AASLD guidelines for treatment of chronic hepatitis B. *Hepatology.* 2016; 63:261–83. doi: [10.1002/hep.28156](https://doi.org/10.1002/hep.28156) PMID: [26566064](https://pubmed.ncbi.nlm.nih.gov/26566064/)
